# Supplementary material for: Demarcated redness associated with increased vascular density/size: a useful marker of flat-type dysplasia in patients with ulcerative colitis
Source: PubMed Central journal article supplement — Endosc Int Open. 2021 Apr 12;9(4):E552–61. doi: 10.1055/a-1352-2709 (PMC8041573; doi:10.1055/a-1352-2709), 2021-04-12
Supplement: 1959supmat_10-1055-a-1352-2709.pdf [file 1959supmat_10-1055-a-1352-2709.pdf]

## Supplementary material

**Supplementary Table 1** Characteristics of nine UC patients with flat-type dysplasia.

| Patient No. | Age | Sex    | Duration of disease, y | Extent     | Mayo endoscopic score | Geboes histological score |
|-------------|-----|--------|------------------------|------------|-----------------------|---------------------------|
| 1           | 69  | Male   | 13                     | Extensive  | 0                     | 0                         |
| 2           | 39  | Female | 22                     | Extensive  | 0                     | 0                         |
| 3           | 46  | Male   | 35                     | Extensive  | 0                     | 0                         |
| 4           | 54  | Male   | 31                     | Extensive  | 0                     | 0                         |
| 5           | 69  | Male   | 24                     | Extensive  | 0                     | 0                         |
| 6           | 70  | Male   | 39                     | Extensive  | 0                     | 1                         |
| 7           | 56  | Male   | 16                     | Left-sided | 1                     | 1                         |
| 8           | 45  | Male   | 24                     | Extensive  | 1                     | 2                         |
| 9           | 49  | Female | 14                     | Extensive  | 0                     | 1                         |

UC, ulcerative colitis.

## Supplementary material

**Supplementary Table 2** Endoscopic and histological findings from 10 dysplastic lesions.

| Case No. | Location | Morphologic category (SCENIC) | Color | Size of lesion (mm) | Transmural invasion | Histology |         |
|----------|----------|-------------------------------|-------|---------------------|---------------------|-----------|---------|
|          |          |                               |       |                     |                     | Flat      | Sessile |
| 1        | Ra       | Flat                          | Red   | 38×20               | M                   | LGD       |         |
| 2        | S        | Flat                          | Red   | 25×23               | M                   | HGD + LGD |         |
| 3        | S        | Flat > sessile                | Red   | 36×30               | M                   | LGD       | HGD     |
| 4        | S        | Flat > sessile                | Red   | 20×20               | M                   | HGD + LGD | HGD     |
| 5        | Rb       | Flat                          | Red   | 32×12               | M                   | HGD + LGD |         |
| 6        | Ra       | Flat                          | Red   | 50×25               | M                   | HGD + LGD |         |
| 7        | Rb       | Flat > sessile                | Red   | 50×50               | M                   | HGD       | HGD     |
| 8        | A        | Flat                          | Red   | 20×15               | M                   | HGD       |         |
| 9-1      | Rs       | Flat                          | Red   | 32×21               | M                   | LGD       |         |
| 9-2      | Ra       | Flat                          | Red   | 25×13               | M                   | LGD       |         |

LGD, low-grade dysplasia; HGD, high-grade dysplasia; A, ascending colon; S, sigmoid colon; Rs, rectosigmoid colon; Ra, rectum above the peritoneal reflection; Rb, rectum below the peritoneal reflection; M, mucosa.

## Supplementary material

Supplementary Table 3 Histological assessment of intramucosal vascular density/size of 10 dysplastic lesions.

| Case | Non-n               | Vessel density (mm <sup>2</sup> ) |                        |                                                                                                  | P value                              |
|------|---------------------|-----------------------------------|------------------------|--------------------------------------------------------------------------------------------------|--------------------------------------|
|      |                     | LGD (flat)                        | HGD (flat)             | HGD (sessile)                                                                                    |                                      |
| 1    | 56.2<br>(26.1-77.3) | 109.6<br>(81.6-132.4)             |                        | Non-n vs LGD (flat)                                                                              | < 0.01                               |
| 2    | 34.4<br>(23.2-42.1) | 73<br>(58.4-88.5)                 | 92.3<br>(78.9-98.9)    | Non-n vs LGD (flat)<br>Non-n vs HGD (flat)                                                       | < 0.01<br>< 0.01                     |
| 3    | 48.1<br>(34.4-61.9) | 96.3<br>(85.3-122.5)              | 67.8<br>(46.0-96.3)    | Non-n vs LGD (flat)<br>Non-n vs HGD (sessile)<br>LGD (flat) vs HGD (sessile)                     | < 0.01<br>< 0.01<br>< 0.01           |
| 4    | 60.2<br>(44.2-76.3) | 101.2<br>(75.9-120.5)             | 132.5<br>(104.7-159.6) | Non-n vs LGD (flat)<br>Non-n vs HGD (flat)<br>Non-n vs HGD (sessile)<br>LGD (flat) vs HGD (flat) | < 0.01<br>< 0.01<br>< 0.01<br>< 0.01 |
| 5    | 36.1<br>(28.1-48.2) | 81.7<br>(62.3-108.9)              | 96.4<br>(66.3-126.5)   | HGD (flat) vs HGD (sessile)<br>Non-n vs LGD (flat)<br>Non-n vs HGD (flat)<br>Non-n vs LGD (flat) | < 0.01<br>< 0.01<br>< 0.01<br>< 0.01 |

## Supplementary material

|                         |                       |                        |                     |                                                                              |                               |
|-------------------------|-----------------------|------------------------|---------------------|------------------------------------------------------------------------------|-------------------------------|
| 6                       | 20.1<br>(12.0-24.1)   | 34.4<br>(20.6-44.7)    | 48.1<br>(34.4-65.3) | Non-n vs HGD (flat)<br>LGD (flat) vs HGD (flat)                              | < 0.01<br>< 0.01              |
| 7                       | 28.8<br>(19.2-38.5)   | 40.2<br>(32.1-56.2)    | 59.1<br>(48.1-67.8) | Non-n vs HGD (flat)<br>Non-n vs HGD (sessile)<br>HGD (flat) vs HGD (sessile) | < 0.01<br>< 0.01<br>< 0.01    |
| 8                       | 42.2<br>(30.1-54.2)   | 57.2<br>(47.4-71.5)    |                     | Non-n vs HGD (flat)                                                          | < 0.01                        |
| 9-1                     | 54.9<br>(35.7-74.2)   | 73.3<br>(61.5-89.0)    |                     | Non-n vs LGD (flat)                                                          | < 0.01                        |
| 9-2                     | 54.9<br>(33.0-65.9)   | 62.8<br>(44.5-89.0)    |                     | n.s                                                                          |                               |
| <b>Vessel size (µm)</b> |                       |                        |                     |                                                                              |                               |
| <b>Case</b>             | <b>Non-N</b>          | <b>LGD (flat)</b>      | <b>HGD (flat)</b>   | <b>HGD (sessile)</b>                                                         | <b>P value</b>                |
| 1                       | 10.51<br>(8.52-12.68) | 12.08<br>(10.04-14.87) |                     |                                                                              | Non-n vs LGD (flat)<br>< 0.01 |
| 2                       | 9.88                  | 9.92                   | 10.92               |                                                                              | n.s                           |

## Supplementary material

|   |              |              |               |               |                             |        |
|---|--------------|--------------|---------------|---------------|-----------------------------|--------|
| 3 | (8.08-13.22) | (8.28-12.70) | (8.98-13.94)  |               | Non-n vs LGD (flat)         | < 0.01 |
|   | 10.89        | 9.88         |               | 12.57         | Non-n vs HGD (sessile)      | < 0.01 |
|   | (8.52-15.29) | (8.13-12.08) |               | (9.55-17.27)  | LGD (flat) vs HGD (sessile) | < 0.01 |
| 4 | 9.37         | 10.04        | 11.82         | 13.35         | Non-n vs LGD (flat)         | < 0.01 |
|   | (8.08-11.71) | (8.28-12.60) | (9.71-15.05)  | (10.24-17.83) | Non-n vs HGD (flat)         | < 0.01 |
|   |              |              |               |               | LGD (flat) vs HGD (flat)    | < 0.01 |
| 5 | 10.46        | 10.79        | 13.34         |               | LGD (flat) vs HGD (sessile) | < 0.01 |
|   | (8.88-13.25) | (8.98-13.55) | (10.79-16.76) |               | HGD (flat) vs HGD (sessile) | < 0.01 |
|   |              |              |               |               | Non-n vs LGD (flat)         | < 0.01 |
| 6 | 10.19        | 10.46        | 10.58         |               | Non-n vs HGD (flat)         | < 0.01 |
|   | (8.52-13.17) | (8.73-12.73) | (8.98-13.39)  |               | LGD (flat) vs HGD (flat)    | < 0.01 |
|   |              |              |               |               | Non-n vs HGD (flat)         | < 0.01 |

## Supplementary material

|     |                            |                        |                       |                                                          |                  |
|-----|----------------------------|------------------------|-----------------------|----------------------------------------------------------|------------------|
| 7   | 9.47<br>(8.52-<br>11.49)   | 10.06<br>(8.57-12.31)  | 11.71<br>(9.65-13.60) | Non-n vs HGD (sessile)<br>HGD (flat) vs HGD<br>(sessile) | < 0.01<br>< 0.01 |
| 8   | 12.98<br>(10.45-<br>16.86) | 14.99<br>(12.29-20.00) |                       | Non-n vs HGD (flat)                                      | < 0.01           |
| 9-1 | 9.85<br>(8.75-<br>12.22)   | 10.26<br>(8.75-12.56)  |                       |                                                          | n.s              |
| 9-2 | 10.40<br>(8.90-<br>12.89)  | 62.8<br>(8.90-13.14)   |                       |                                                          | n.s              |

---

Non-n, non-neoplastic lesion; LGD, low-grade dysplasia; HGD, high-grade dysplasia.

## Supplementary material

**Supplementary Table 4** VEGF expression of dysplastic lesions and noncancerous surrounding mucosa.

| Case | Non-n | LGD (flat) | HGD (flat) | HGD (sessile) |
|------|-------|------------|------------|---------------|
| 1    | 1+    | 2+         | N/A        | N/A           |
| 2    | 1+    | 3+         | 3+         | N/A           |
| 3    | 0+    | 2+         | N/A        | 3+            |
| 4    | 1+    | 2+         | 3+         | 3+            |
| 5    | 0+    | 2+         | 3+         | N/A           |
| 6    | 0+    | 2+         | 3+         | N/A           |
| 7    | 1+    | N/A        | 3+         | 3+            |
| 8    | 1+    | N/A        | 3+         | N/A           |
| 9-1  | 0+    | 2+         | N/A        | N/A           |
| 9-2  | 0+    | 2+         | N/A        | N/A           |

VEGF, vascular endothelial growth factor; Non-n, non-neoplastic lesion; LGD, low-grade dysplasia; HGD, high-grade dysplasia; N/A, not available

**Supplementary Table 5** Characteristics of 2 UC patients with intramucosal signet-ring cell carcinoma and HGD components.

| Case | Age | Sex  | Duration of disease, y | Extent    | Clinical type      |
|------|-----|------|------------------------|-----------|--------------------|
| S1   | 80  | Male | 25                     | Extensive | Relapse-remitting  |
| S2   | 30  | Male | 11                     | Extensive | Chronic-continuous |

UC, ulcerative colitis.

## Supplementary material

**Supplementary Table 6** Endoscopic and histological findings from two dysplastic lesions with intramucosal signet-ring cell carcinoma and HGD components.

| No. | Location | Morphologic category (SCENIC) | Color      | Size of lesion (mm) | Transmural invasion | Histology |
|-----|----------|-------------------------------|------------|---------------------|---------------------|-----------|
| S1  | Rb       | Superficial elevated          | discolored | 18×9                | M                   | Sig+HGD   |
| S2  | Rb       | Depressed                     | discolored | 11×8                | M                   | Sig+HGD   |

Sig, signet-ring cell carcinoma; HGD, high-grade dysplasia.

**Supplementary Table 7** Histological assessment of intramucosal vascular density/size of two intramucosal HGD and signet-ring cell carcinoma lesions.

| Case | Vessel density (mm <sup>2</sup> ) |                     |         | Vessel size (μm)      |                      | P value |
|------|-----------------------------------|---------------------|---------|-----------------------|----------------------|---------|
|      | HGD                               | Sig                 | P value | HGD                   | Sig                  |         |
| S1   | 82.3<br>(63.3-88.4)               | 23.8<br>(20.8-35.0) | < 0.01  | 11.48<br>(9.47-15.53) | 9.9<br>(8.07-11.67)  | < 0.01  |
| S2   | 106.0<br>(91.5-110.2)             | 52.0<br>(46.8-58.7) | 0.04    | 9.98<br>(8.13-13.16)  | 9.02<br>(8.08-11.71) | < 0.01  |

HGD, high-grade dysplasia; Sig, signet-ring cell carcinoma.
